# Supplementary material for: Tbx18 Regulates the Differentiation of Periductal Smooth Muscle Stroma and the Maintenance of Epithelial Integrity in the Prostate
Source: PLoS One. 2016 Apr 27;11(4):e0154413. doi: 10.1371/journal.pone.0154413 (PMC4847854; doi:10.1371/journal.pone.0154413)
Supplement: S3 Table — The primer sets listed were used to validate expression in individual E16.5 and E18.5 animals comprising a sequenced pool, with results reported in S1 Fig. Primer sets are named after the target gene, with “-f “after each gene name denoting “forward”, and “-r” denoting “reverse” primer designs. (XLSX) [file pone.0154413.s004.xlsx]

## Sheet: 2015 TBX18 primer list.txt
S3 Table. Primer sequences used for qRT-PCR (results in S1 Figure)
primer name (gene name followed by _f=forward or _r=reverse primer)	primer sequence (5'-3')
acta1_f	CCCAAAGCTAACCGGGAGAAG
acta1_r	CCAGAATCCAACACGATGCC
actg2_f	CCGCCCTAGACATCAGGGT
actg2_r	TCTTCTGGTGCTACTCGAAGC
cnn1_f	TCTGCACATTTTAACCGAGGTC
cnn1_r	GCCAGCTTGTTCTTTACTTCAGC
Ctdsp2_f	AAGGCCCTCTTGTGCTGTTTC
Ctdsp2_r	GATCGGACTTGGCGATGGT
Dpt_f	TGGATGGGTGAATCTTAACCGC
Dpt_r	TCAGAGCCTTCCTTCTTGCTA
Gdf15_f	CTGGCAATGCCTGAACAACG
Gdf15_r	GGTCGGGACTTGGTTCTGAG
Irx2_f	ACACCACCGGAATGACTGG
Irx2_r	GGGGTCGTTGAGCTGGTATG
Krt20_f	AGTTTTCACCGAAGTCTGAGTTC
Krt20_r	GTAGCTCATTACGGCTTTGGAG
Myod1_f	CCACTCCGGGACATAGACTTG
Myod1_r	AAAAGCGCAGGTCTGGTGAG
Myog_f	GAGACATCCCCCTATTTCTACCA
Myog_r	GCTCAGTCCGCTCATAGCC
Pax7_f	TGGGGTCTTCATCAACGGTC
Pax7_r	ATCGGCACAGAATCTTGGAGA
Pitx1_f	GCCTTCAAGGGAGGCATGAG
Pitx1_r	GATTCGCTGGCGGAGTTCTC
Prss27_f	TGGGCATCCAAAGATGTTCAAC
Prss27_r	CTTCACGGGGACATACAAGGC
S100a9_f	GCACAGTTGGCAACCTTTATG
S100a9_r	TGATTGTCCTGGTTTGTGTCC
Serpine1_f	TTCAGCCCTTGCTTGCCTC
Serpine1_r	ACACTTTTACTCCGAAGTCGGT
Sim2_f	CACAGCAATACAGCTCCTTCC
Sim2_r	CGGCCCATATAAAAGGTCGCT
tbx15_f	CTCCGTTGAAGCCTTGATCGG
tbx15_r	AGACGCCAGGTCAGTGTGA
sox9_f	AGTACCCGCATCTGCACAAC
sox9_r	ACGAAGGGTCTCTTCTCGCT
wt1_f	GGCTTCCACGTGTGTCCCGG
wt1_r	AGGCGCGAAGTCCAACACGG
